# Temperature Response of Soil Respiration in a Chinese Pine Plantation: Hysteresis and Seasonal vs. Diel $Q_{10}$

Xin Jia<sup>1</sup>, Tianshan Zha<sup>1\*</sup>, Bin Wu<sup>1</sup>, Yuqing Zhang<sup>1</sup>, Wenjing Chen<sup>1</sup>, Xiaoping Wang<sup>2</sup>, Haiqun Yu<sup>2</sup>, Guimei He<sup>2</sup>

<sup>1</sup> School of Soil and Water Conservation, Beijing Forestry University, Beijing, China, <sup>2</sup> Beijing Forestry Carbon Administration, Beijing, China

## Abstract

Although the temperature response of soil respiration ( $R_s$ ) has been studied extensively, several issues remain unresolved, including hysteresis in the  $R_s$ –temperature relationship and differences in the long- vs. short-term  $R_s$  sensitivity to temperature. Progress on these issues will contribute to reduced uncertainties in carbon cycle modeling. We monitored soil  $\text{CO}_2$  efflux with an automated chamber system in a *Pinus tabulaeformis* plantation near Beijing throughout 2011. Soil temperature at 10-cm depth ( $T_s$ ) exerted a strong control over  $R_s$ , with the annual temperature sensitivity ( $Q_{10}$ ) and basal rate at 10°C ( $R_{s10}$ ) being 2.76 and 1.40  $\mu\text{mol m}^{-2} \text{s}^{-1}$ , respectively. Both  $R_s$  and short-term (i.e., daily) estimates of  $R_{s10}$  showed pronounced seasonal hysteresis with respect to  $T_s$ , with the efflux in the second half of the year being larger than that early in the season for a given temperature. The hysteresis may be associated with the confounding effects of microbial population dynamics and/or litter input. As a result, all of the applied regression models failed to yield unbiased estimates of  $R_s$  over the entire annual cycle. Lags between  $R_s$  and  $T_s$  were observed at the diel scale in the early and late growing season, but not in summer. The seasonality in these lags may be due to the use of a single  $T_s$  measurement depth, which failed to represent seasonal changes in the depth of  $\text{CO}_2$  production. Daily estimates of  $Q_{10}$  averaged 2.04, smaller than the value obtained from the seasonal relationship. In addition, daily  $Q_{10}$  decreased with increasing  $T_s$ , which may contribute feedback to the climate system under global warming scenarios. The use of a fixed, universal  $Q_{10}$  is considered adequate when modeling annual carbon budgets across large spatial extents. In contrast, a seasonally-varying, environmentally-controlled  $Q_{10}$  should be used when short-term accuracy is required.

**Citation:** Jia X, Zha T, Wu B, Zhang Y, Chen W, et al. (2013) Temperature Response of Soil Respiration in a Chinese Pine Plantation: Hysteresis and Seasonal vs. Diel  $Q_{10}$ . PLoS ONE 8(2): e57858. doi:10.1371/journal.pone.0057858

**Editor:** Ben Bond-Lamberty, DOE Pacific Northwest National Laboratory, United States of America

**Received:** September 9, 2012; **Accepted:** January 28, 2013; **Published:** February 28, 2013

**Copyright:** © 2013 Jia et al. This is an open-access article distributed under the terms of the Creative Commons Attribution License, which permits unrestricted use, distribution, and reproduction in any medium, provided the original author and source are credited.

**Funding:** This study was financially supported by the Beijing Forestry University Young Scientist Fund (BLX2011008), International Science and Technology Cooperation Program of China (2009DFA92900), and National Key Technology and Science Research and Development Program of China (2008BAD95B07). The funders had no role in study design, data collection and analysis, decision to publish, or preparation of the manuscript.

**Competing Interests:** The authors have declared that no competing interests exist.

\* E-mail: tianshanzha@bjfu.edu.cn

## Introduction

A global effort is underway to mitigate anthropogenic climate change through afforestation/reforestation, in hope of sequestering carbon in plantation ecosystems. At the global scale, afforestation is occurring at 2.8 million ha yr<sup>-1</sup> [1]. Understanding the environmental controls on carbon dynamics in new plantations is crucial for projecting future global carbon budget and climate scenarios, and could aid in assessing the effectiveness of carbon-oriented management practices in forestry.

Soil-surface  $\text{CO}_2$  efflux, commonly referred to as soil respiration ( $R_s$ ), constitutes a major source of carbon release to the atmosphere, and accounts for more than two-thirds of annual ecosystem respiration ( $R_e$ ) and one-half of gross ecosystem photosynthesis ( $P_g$ ) in temperate forests [2]. Aside from its large quantity,  $R_s$  is exponentially related to soil temperature ( $T_s$ ) in most ecosystems [3,4]. Consequently, even subtle changes in climate (e.g., rising atmospheric temperature) could trigger significant changes in  $R_s$ , markedly altering ecosystem carbon budgets. In turn, warming-induced increases in soil  $\text{CO}_2$  emissions could feed back to the climate system, although the intensity of climate-carbon cycle feedbacks remains an issue of debate [5]. Despite the large body of literature on the interactions between  $R_s$  and climate

change, the response of soil carbon processes to climatic factors (e.g.,  $T_s$  and soil moisture) is not well-known and remains a source of uncertainty in ecosystem carbon modeling [6,7].

Soil  $\text{CO}_2$  efflux is usually modeled as a simple function of  $T_s$  (e.g., the classic  $Q_{10}$  function) at both diel and seasonal scales [2]. However, under field conditions the response of  $R_s$  to  $T_s$  is modulated by multiple factors at multiple temporal scales [8,9]. An increasing body of evidence indicates that forest  $R_s$  is not adequately characterized by a simple function of  $T_s$ , as other regulators (e.g., microbial dynamics, plant phenology and photosynthesis, soil water content and soil porosity) are able to confound the  $R_s$ – $T_s$  relationship and lead to hysteresis (or phase lags) in the  $R_s$ – $T_s$  relationship at multiple scales [8–10]. Hysteresis relationships provide information on the causality between two processes [9]. Detecting and interpreting the decoupling between  $R_s$  and  $T_s$  over timescales of hours to seasons can provide important insights into the mechanisms driving  $R_s$  [9,10]. In addition, to accurately estimate carbon dynamics at multiple timescales in ecosystem carbon-cycle modeling, hysteresis relationships need to be explicitly considered [2,10]. The parameterization of  $R_s$  and  $R_e$  in carbon cycle models poses a major challenge when other factors confound the temperature response [7,11]. A recent synthesis

reported that hysteresis in the  $R_s$ - $T_s$  relationship is more common in forests than previously recognized [9].

Apart from hysteresis, confounding factors also cause a discrepancy between long-term (e.g., annual) and short-term (e.g., diel) temperature response parameters (e.g.,  $R_{s10}$ —the basal rate at 10°C; and  $Q_{10}$ —the temperature sensitivity) [2,11]. The apparent annual  $Q_{10}$  may not reflect the true biotic temperature sensitivity if obscured by seasonally varying factors other than  $T_s$  [11]. This is related to the ongoing debate on the use of a fixed (universal) vs. variable (environmentally-controlled)  $Q_{10}$  in carbon cycle modeling [7]. On the one hand, recent cross-site analyses point to a convergent sensitivity of respiration to temperature [7,12], negating previous conclusions that relate  $Q_{10}$  to climatic and substrate annual  $Q_{10}$  [13,14]. Using FLUXNET data across 60 sites, Mahecha et al. [7] found that the apparent annual  $Q_{10}$  for  $R_e$  decreased with increasing mean annual temperature, while short-term  $Q_{10}$ , exempt from seasonally-confounding effects, converged to  $\sim 1.4$  across sites. In addition, a meta-analysis revealed that the seasonal  $Q_{10}$  for  $R_s$  approximated 1.5 after excluding the confounding effects of vegetation seasonality [12]. On the other hand, single-site studies have reported large seasonal variation and temperature dependence of short-term unconfounded  $Q_{10}$  estimates for  $R_s$  in forest ecosystems [2,6,11]. Therefore, comparing longer-term, apparent  $Q_{10}$  estimates of seasonal sensitivity with shorter-term estimates of daily sensitivity may provide new insights into the driving mechanisms of  $R_s$  and  $R_e$ , and shed light on model parameterization.

Detecting hysteresis at multiple timescales and resolving the aforementioned debate require long-term measurements of  $R_s$  over both daily and seasonal cycles [15]. Recent studies have emphasized the use of automated chambers due to their ability to produce information about processes at fine temporal resolutions [16]. Continuous  $R_s$  measurements in China's plantation forests are rare, despite the country's extensive efforts in afforestation (e.g., 8.43 million ha of new plantations from 2004 to 2008) [1]. The few existing studies were mostly based on measurements made at coarse intervals (e.g., days to weeks) [17,18], which are inadequate to fully unravel the dependency of  $R_s$  on its controlling factors.

Using an automated chamber system, we monitored half-hourly values of  $R_s$ ,  $T_s$  and soil volumetric water content ( $VWC$ ) throughout 2011 in a Chinese pine (*Pinus tabulaeformis*) plantation at Badaling, about 50 km north of Beijing. Our objective was to quantify the seasonal and diel temperature responses of  $R_s$ . We asked: (1) whether  $R_s$  varies in-phase or out-of-phase with  $T_s$  at diel and seasonal timescales; and (2) whether the apparent annual  $Q_{10}$  and  $R_{s10}$  are consistent with values derived at the diel timescale. Within-stand spatial uncertainty was also analyzed and briefly discussed. We paid special attention to the implications of these results for the parameterization of carbon cycle models.

## Materials and Methods

### 2.1. Ethics Statement

The study site is owned by Beijing Bureau of Forestry and Landscaping. The field work did not involve any endangered or protected species, and did not involve destructive sampling. Therefore, no specific permits were required for the described study.

### 2.2. Site description

The study site was a *P. tabulaeformis* plantation located in the Badaling Mountain region of Beijing (40°22.38'N, 115°56.65'E, 535 m a.s.l.). The terrain is flat and uniform. The soil is of coarse-

textured loess type, with phosphorous being the limiting nutrient for plant growth. The soil bulk density is 1.6 g cm<sup>-3</sup>. The plantation was a stand of 4-year-old *P. tabulaeformis* trees with a mean diameter at breast height ( $DBH$ ) of 3.2±0.8 cm (± standard deviation, SD) and a mean height of 2.2±0.3 m in May, 2011. The stand density was 975 stems ha<sup>-1</sup>. The study site has no understory shrubs and only a sparse herbaceous cover (<10%).

The site is characterized by a temperate continental monsoon climate with hot and moist summers and cold and dry winters. Mean annual temperature (MAT) for 1985–2005 was 10.8°C, with highest and lowest mean monthly temperature of 26.9°C and -7.2°C in July and January, respectively (Meteorological Service of China). There were on average 160 frost-free days y<sup>-1</sup>. Mean annual precipitation (MAP) was 454 mm, 59% of which fell in July and August. Mean annual potential evapotranspiration was 1586 mm, about three times the precipitation. The study year (2011) was cooler and wetter than normal, with MAT and MAP being 9.2°C and 568 mm, respectively.

### 2.3. Field measurements

An automated chamber system was installed at the study site in November 2010 to make half-hourly measurements of  $R_s$ . The system consisted of a LI-840 infrared gas analyzer (IRGA; LI-COR Inc., Lincoln, NE, USA), five custom-designed chambers, a CR1000 data logger (Campbell Scientific, Logan, UT, USA) and a rotary vane pump. Each chamber consisted of an alloy base and a moveable opaque dome. A pair of rotatable alloy arms connecting the dome and the base was promoted by a 12 V DC motor to open or close the chamber cap. When not in use, the chambers were kept open. The chamber base was placed over a fixed PVC collar which was 19 cm in diameter and 11 cm in height (inserted into the soil to a depth of about 7 cm). Collar insertion should have little impact on root dynamics because in this area most root biomass of *P. tabulaeformis* (>90%) is distributed at depths greater than 10 cm below the soil surface [19]. Rubber rings were used to seal the junctions among the chamber dome, base and collar. The tube connecting the chamber and the IRGA was about 15 m in length. The five chambers were randomly deployed in a 30-m diameter plot. A tube of 3 cm in length was mounted on the chamber as a vent to equalize the pressure inside and outside the chamber. Air temperature inside each chamber was measured using a type T thermocouple (Omega Engineering Inc., Stamford, CT, USA). The vegetation within collars was carefully removed one month before the start of measurements. Regrowth was minimal, and any regrowth was clipped regularly to avoid complication in the interpretation of the measurements.

The system measured soil CO<sub>2</sub> efflux at half-hourly intervals. Five chambers, which shared a common IRGA through a multiplexer, were activated one at a time in each measurement cycle. Prior to closure, each chamber was purged with ambient air for 2 min to flush out the tubing. After closure, the air was circulated through the chamber and IRGA at a flow rate of 0.5 L min<sup>-1</sup>. The IRGA sampled CO<sub>2</sub> (μmol mol<sup>-1</sup> moist air) and H<sub>2</sub>O (mmol mol<sup>-1</sup> moist air) concentrations over a 2 min interval, and the data logger recorded the mole fractions at 2 s intervals. The data logger computed the rate of change in CO<sub>2</sub> mixing ratio (μmol mol<sup>-1</sup> dry air) through linear regression of the CO<sub>2</sub> mixing ratio against time (with a deadband of 10 s), and then calculated and stored the half-hourly rates of soil CO<sub>2</sub> efflux.

Half-hourly  $R_s$  ( $\mu\text{mol m}^{-2} \text{s}^{-1}$ ) was computed as:

$$R_s = \frac{d\text{CO}_2}{dt} \times \frac{PV}{ART} \quad (1)$$

where  $d\text{CO}_2/dt$  is the rate of change in  $\text{CO}_2$  mixing ratio over time.  $P$  is the atmospheric pressure (atm).  $V$  is the chamber volume (L), which is the sum of the aboveground collar volume and the chamber-top volume.  $T$  is the air temperature within the chamber (K),  $A$  the soil area within the collar ( $0.028 \text{ m}^2$ ), and  $R$  the ideal gas constant ( $0.08206 \text{ L atm mol}^{-1} \text{ K}^{-1}$ ). The chamber-top volume was 2.8 L for all chambers. Collar volumes were calculated for each sampling location through multiplying the aboveground collar height by  $A$ .

Half-hourly  $T_s$  and  $VWC$  at 10-cm depth were measured adjacent to each chamber.  $VWC$  was monitored with EC-5 soil moisture sensors (Decagon Devices Inc., Pullman, WA, USA) and  $T_s$  was monitored with thermistor probes (Omega Engineering Inc., Stamford, CT, USA). Each month, three soil cores of 3 cm in diameter to a depth of 15 cm were collected close to each chamber and stored in plastic bags. The 5–15 cm depth section of the soil samples were taken to the laboratory, weighed, oven dried at  $80^\circ\text{C}$  to constant weight, and reweighed to determine the gravimetric water content. Bulk density was determined for the same soil samples. Automated  $VWC$  measurements were then calibrated against those derived from manual measurements on a monthly basis.

#### 2.4. Data analysis

The half-hourly  $\text{CO}_2$  effluxes were screened as follows. Values outside the range of  $-5$  to  $20 \mu\text{mol m}^{-2} \text{s}^{-1}$  were considered abnormal and removed from the dataset. A mean  $\pm 5\text{SD}$  criterion was then applied to monthly datasets to exclude outliers [1]. Instrument failure and quality control together resulted in 31% to 39% missing values for different chambers in 2011 (Fig. 1C). The remaining  $R_s$  data spanned the annual cycles of both  $T_s$  and  $VWC$ , allowing us to examine the relationships between  $R_s$  and its regulating factors. In order to estimate annual  $R_s$ , missing  $T_s$  values were gap-filled using empirical relationships to half-hourly soil temperatures recorded at an eddy-covariance tower 30 m away. When the tower measurements were also missing, the mean diurnal variation (MDV) method [20] with weekly windows was used to fill gaps in  $T_s$ .

The relationships between  $R_s$  and  $T_s$  were evaluated for both long-term (seasonal) and short-term (diel) timescales. The relationships were assessed for each sampling location separately, and also for the mean of the five chambers.

The long-term relationships were estimated based on daily mean values from complete annual cycle, using four common models: Exponential ( $Q_{10}$  [21]), Arrhenius [21], Quadratic [1] and Logistic [1] (see Table 1 for the equations). Daily mean rather than half-hourly values were used to minimize noise caused by asynchrony at the diel scale. Recent studies have shown that daily values are more robust than hourly values for examining seasonal responses to temperature [22]. The  $Q_{10}$  model was also fit separately for each month. Root mean square error (RMSE) and the coefficient of determination ( $R^2$ ) were used to evaluate model performance. RMSE and  $R^2$  were compared among models using a bootstrap approach in which the dataset was sampled 2000 times, followed by one-way analyses of variance (ANOVA) and Tukey's HSD multiple comparisons.

The short-term temperature response of  $R_s$  was quantified using half-hourly data. A single model (the  $Q_{10}$  function) was applied to a

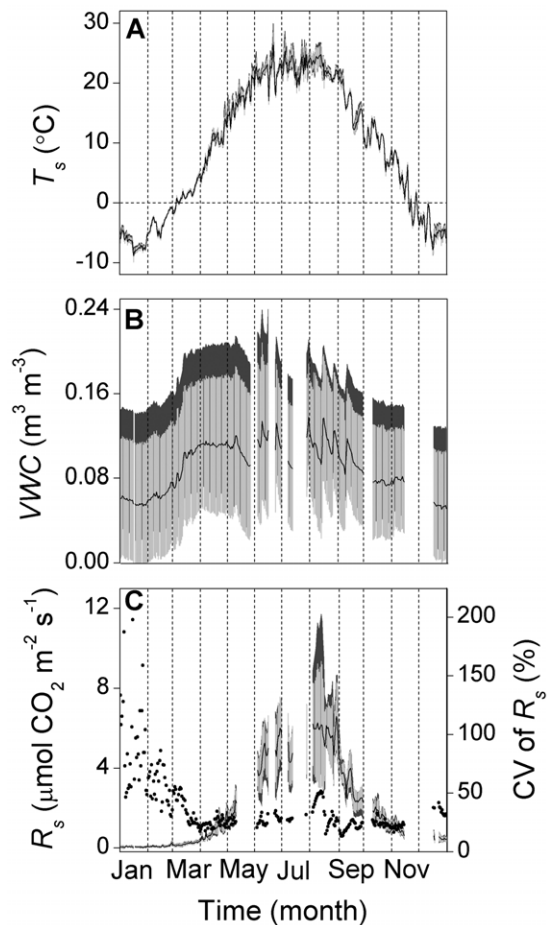

**Figure 1. Soil temperature ( $T_s$ ) (A), volumetric water content ( $VWC$ ) (B) and soil respiration ( $R_s$ ) (C).**  $T_s$  and  $VWC$  were monitored at 10-cm depth. Solid lines: mean across measurement locations; light grey: standard deviation among measurement locations; dark grey: range among measurement locations; black dots in (C): coefficient of variation (CV) for  $R_s$ .

doi:10.1371/journal.pone.0057858.g001

four-day moving window with a one-day time step. To minimize the effects of rain pulses and maximize the robustness of parameter estimation, observations during rainfall or within two hours after rainfall were excluded from the analysis, and a minimum  $R^2$  of 0.5 was required for a valid regression.

Cross-correlation analysis was used to detect hysteresis between  $R_s$  and  $T_s$  at both the seasonal and diel timescales [9,23], and to synchronize the values before the regression was performed. In the case of seasonal hysteresis, analysis of covariance (ANCOVA) was used to examine the difference in  $R_s$  between the first (Jan–June) and second (July–Dec) half of the year, with  $T_s$  as the covariate. Values of  $R_s$  were log-transformed prior to ANCOVA to meet the assumptions of a normal distribution and linear correlation with the covariate. The range, SD and coefficient of variation (CV) were taken as indicators of spatial variability in  $R_s$ ,  $R_{s10}$  and  $Q_{10}$ .

The monthly  $Q_{10}$  models were used to gap-fill daily mean  $R_s$  and estimate annual total  $R_s$ . The 95% confidence intervals (CI) for annual  $R_s$  were estimated by bootstrapping, in which the gap-filled daily mean  $R_s$  time series was sampled 2000 times. All analyses were processed in Matlab 7.11.0 (R2010b, The Mathworks Inc., Natick, MA, USA).

**Table 1.** Parameters and statistics for the analysis of the dependence of daily mean soil respiration ( $R_s$ ) on soil temperature ( $T_s$ ).

| Location     | Model       | Adj. $R^2$               | RMSE                     | $R_{s10}/R_{s283}$ | $Q_{10}$ | $E_0$ |
|--------------|-------------|--------------------------|--------------------------|--------------------|----------|-------|
| Spatial mean | Exponential | 0.925 <sup>d</sup>       | 0.567 <sup>d</sup>       | 1.40               | 2.76     |       |
|              | Arrhenius   | 0.929 <sup>c</sup>       | 0.550 <sup>c</sup>       | 1.40               |          | 70.99 |
|              | Quadratic   | 0.941 <sup>b</sup>       | 0.503 <sup>b</sup>       |                    |          |       |
|              | Logistic    | <b>0.948<sup>a</sup></b> | <b>0.473<sup>a</sup></b> |                    | 4.27     |       |
| Location #1  | Exponential | 0.818 <sup>d</sup>       | 0.535 <sup>d</sup>       | 1.05               | 2.30     |       |
|              | Arrhenius   | 0.821 <sup>c</sup>       | 0.537 <sup>c</sup>       | 1.06               |          | 57.27 |
|              | Quadratic   | 0.850 <sup>b</sup>       | 0.486 <sup>b</sup>       |                    |          |       |
|              | Logistic    | <b>0.854<sup>a</sup></b> | <b>0.486<sup>a</sup></b> |                    | 3.47     |       |
| Location #2  | Exponential | 0.866 <sup>a</sup>       | 1.058 <sup>a</sup>       | 1.52               | 3.57     |       |
|              | Arrhenius   | 0.867 <sup>a</sup>       | 1.054 <sup>a</sup>       | 1.51               |          | 88.76 |
|              | Quadratic   | 0.859 <sup>b</sup>       | 1.087 <sup>b</sup>       |                    |          |       |
|              | Logistic    | <b>0.868<sup>a</sup></b> | <b>1.052<sup>a</sup></b> |                    | 4.01     |       |
| Location #3  | Exponential | 0.900 <sup>d</sup>       | 0.731 <sup>d</sup>       | 1.66               | 2.56     |       |
|              | Arrhenius   | 0.907 <sup>c</sup>       | 0.706 <sup>c</sup>       | 1.66               |          | 65.66 |
|              | Quadratic   | 0.929 <sup>b</sup>       | 0.615 <sup>b</sup>       |                    |          |       |
|              | Logistic    | <b>0.945<sup>a</sup></b> | <b>0.544<sup>a</sup></b> |                    | 4.91     |       |
| Location #4  | Exponential | 0.899 <sup>d</sup>       | 0.528 <sup>d</sup>       | 1.09               | 2.61     |       |
|              | Arrhenius   | 0.905 <sup>c</sup>       | 0.514 <sup>c</sup>       | 1.09               |          | 67.39 |
|              | Quadratic   | 0.918 <sup>b</sup>       | 0.477 <sup>b</sup>       |                    |          |       |
|              | Logistic    | <b>0.929<sup>a</sup></b> | <b>0.443<sup>a</sup></b> |                    | 4.52     |       |
| Location #5  | Exponential | 0.958 <sup>c</sup>       | 0.394 <sup>c</sup>       | 1.32               | 3.39     |       |
|              | Arrhenius   | 0.960 <sup>b</sup>       | 0.386 <sup>b</sup>       | 1.31               |          | 84.81 |
|              | Quadratic   | 0.954 <sup>d</sup>       | 0.413 <sup>d</sup>       |                    |          |       |
|              | Logistic    | <b>0.963<sup>a</sup></b> | <b>0.371<sup>a</sup></b> |                    | 3.93     |       |

Exponential:  $R_s = R_{s10} Q_{10}^{(T_s - 10)/10}$ ; Arrhenius:  $R_s = R_{s283} \exp(E_0/283.15R)(1 - 283.15/T_s)$ ; Quadratic:  $R_s = b_1 + b_2 T_s + b_3 T_s^2$ ; Logistic:  $R_s = \frac{b_1}{1 + \exp(b_2(b_3 - T_s))}$ .  $T_s$  was measured at the 10 cm depth.  $R_{s10}$  and  $R_{s283}$ : basal rate of  $R_s$  at 10°C, in units of  $\mu\text{mol m}^{-2} \text{s}^{-1}$ ;  $Q_{10}$ : relative increase in  $R_s$  for a 10°C increase in  $T_s$ ;  $E_0$ : activation energy for  $R_s$ , in units of  $\text{kJ mol}^{-1}$ ;  $R$ : universal gas constant ( $8.314 \text{ J mol}^{-1} \text{ K}^{-1}$ );  $b_1$  through  $b_3$ : fitted parameters. Adj.  $R^2$ : adjusted coefficient of determination; RMSE: root mean square error, in units of  $\mu\text{mol m}^{-2} \text{s}^{-1}$ . Values in bold indicate best-fits according to Adj.  $R^2$  and RMSE. Different letters following Adj.  $R^2$  and RMSE indicate significant differences at the 0.05 level.  
doi:10.1371/journal.pone.0057858.t001

## Results

### 3.1. Seasonal pattern of $R_s$ and its temperature response

Daily mean  $T_s$  was lowest on January 16th ( $-8.9^\circ\text{C}$ ), rose rapidly in February to June, remained high throughout summer ( $\sim 25^\circ\text{C}$ ), and decreased after mid August (Fig. 1A). Daily mean  $VWC$  averaged across locations was low in winter and high during the growing season, ranging from 0.05 to  $0.14 \text{ m}^3 \text{ m}^{-3}$  (Fig. 1B). Pulse dynamics in  $VWC$  were obvious from May through September (Fig. 1B). Daily mean  $R_s$  averaged across locations showed strong but asymmetric seasonality over the year (Fig. 1C). Daily mean  $R_s$  was lowest in January ( $< 0.1 \mu\text{mol m}^{-2} \text{s}^{-1}$ ), did not show remarkable increases until March, peaked in August ( $> 6.0 \mu\text{mol m}^{-2} \text{s}^{-1}$ ), and then decreased rapidly to  $\sim 0.5 \mu\text{mol m}^{-2} \text{s}^{-1}$  at the end of the year. Cross-correlation analyses revealed that, although the correlation between daily mean  $R_s$  and  $T_s$  was highest at zero lag for all locations, the correlation coefficient was

strongly asymmetric about the zero lag, with negative lags ( $R_s$  lagging  $T_s$ ) reducing the correlation coefficient much more rapidly than positive lags.

Spatial variability in  $R_s$  was substantial. The CV of daily  $R_s$  among chambers varied between 10% and 50% from March to December (Fig. 1C), averaging 28%. The large CV in January and February was caused by the near-zero magnitude of  $R_s$ . We did not find any evidence that the spatial variation in  $R_s$  was related to  $VWC$  or the distance to trees.

All four models of the seasonal  $R_s$ - $T_s$  relationship performed well (Table 1). The three-parameter logistic model performed slightly better than the others, with consistently higher  $R^2$  and lower RMSE. However, the annual model fits were unable to capture the pronounced seasonal hysteresis that was evident in the daily data, with  $R_s$  in the second half of the season being larger than that in the first half at a given  $T_s$  (Fig. 2). Significant seasonal hysteresis in the  $R_s$ - $T_s$  relationship was observed for all sampling locations (and also for the spatial averages), with greater magnitudes for locations #1–3 than #4–5 (Fig. 2). As a result, the most commonly cited  $Q_{10}$  model and the best-fit logistic model both failed to yield unbiased  $R_s$  estimates over the entire annual cycle. The  $Q_{10}$  model captured daily  $R_s$  in autumn well, but overestimated  $R_s$  in spring (Fig. 3A). In contrast, the logistic model underestimated daily  $R_s$  in late autumn (Fig. 3B). The  $R_{s\_modeled}$  vs.  $R_{s\_measured}$  regression line significantly deviated from the 1:1 line according to the 95% CI for the slopes and intercepts (Fig. 3D, E). The estimation was greatly improved by fitting the  $Q_{10}$  model separately for each month (Fig. 3C). Monthly estimation enhanced the  $R^2$  of the  $R_{s\_modeled}$  vs.  $R_{s\_measured}$  relationship, reduced the RMSE, and made the relationship closer to the 1:1 line (Fig. 3F). Temperature normalized  $R_s$  ( $R_{sN}$ , the ratio of observed to modeled values) for both the annual best-fit logistic model and monthly  $Q_{10}$  models were independent of  $VWC$  (results not shown).

The annual  $Q_{10}$  obtained from the exponential model was 2.76, varying from 2.30 to 3.57 across locations (Table 1). The estimated annual  $R_s$  total, as calculated with monthly  $Q_{10}$  parameters and gap-filled  $T_s$ , was  $838 (758, 921) \text{ g C m}^{-2}$ . Across locations, annual  $R_s$  varied from 538 (492, 585) to  $1032 (920, 1146) \text{ g C m}^{-2}$ . The spatial uncertainty for annual  $R_s$  was  $\pm 250 \text{ g C m}^{-2}$ , estimated as the 95% CI for  $n = 5$  locations, assuming a  $t$  distribution with  $n - 1$  degrees of freedom and  $\alpha = 0.05$ .

### 3.2. Diel temperature response of $R_s$

Both diel estimates of  $R_{s10}$  and  $Q_{10}$  showed strong seasonal trends (Fig. 4). Only the period from March to November is shown, as  $R_s$  values were so small and  $T_s$  oscillated so weakly in winter that the regressions produced unreasonable parameter estimates. Mean  $R_{s10}$  across locations was  $< 1.0 \mu\text{mol m}^{-2} \text{s}^{-1}$  in early March, increased throughout April to June, peaked in early August ( $\sim 4.5 \mu\text{mol m}^{-2} \text{s}^{-1}$ ), and then decreased to  $\sim 1.50 \mu\text{mol m}^{-2} \text{s}^{-1}$  in November (Fig. 4A).  $Q_{10}$  was generally low in summer (1.5–2.0), but high at both ends of the growing season (2.0–4.0) (Fig. 4B). A peak in  $Q_{10}$  was evident between March and April.

The variability of  $R_{s10}$  and  $Q_{10}$  across locations can be quantified as functions of their magnitudes (robust regression with bisquare weights:  $\text{Range } R_{s10} = 0.73 R_{s10} - 0.17$ ,  $R^2 = 0.90$ ;  $\text{Range } Q_{10} = 0.82 Q_{10} - 0.47$ ,  $R^2 = 0.78$ ). Both daily  $R_{s10}$  and  $Q_{10}$  had CV values of between 0% and 50% for most time of the season, with high values of these parameters showing greater CV (Fig. 4A, B).

Daily  $R_{s10}$  was positively correlated with  $T_s$ , but with strong hysteresis (Fig. 5A). Fitting an exponential function of  $T_s$  to the spring and autumn seasons separately explained more than 80% of the seasonal variation in  $R_{s10}$ . Daily  $Q_{10}$  was negatively correlated

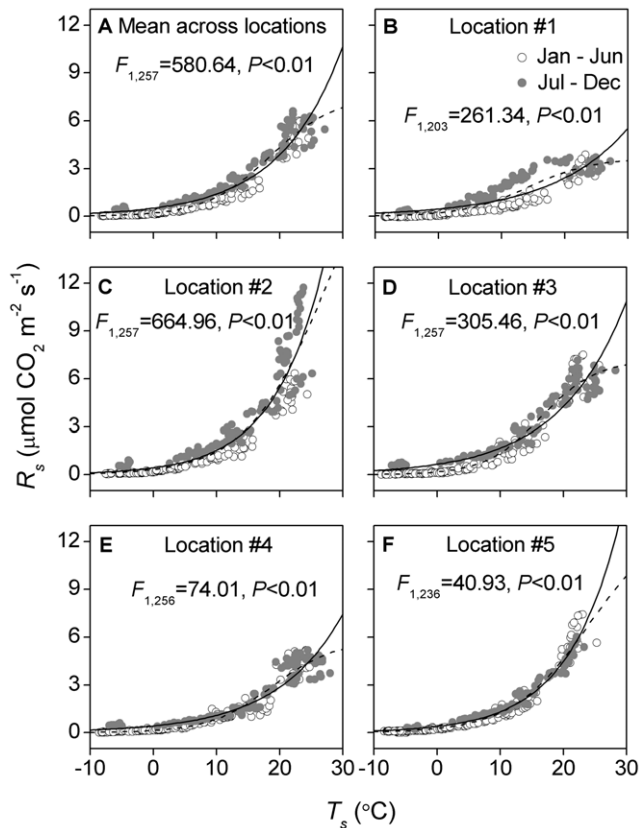

**Figure 2. Relationships between daily mean soil respiration ( $R_s$ ) and soil temperature ( $T_s$ ).**  $T_s$  was monitored at 10-cm depth. Open circles are from January to June; closed circles are from July to December. The solid lines are fitted by a  $Q_{10}$  model; the dashed lines are fitted by a logistic model.  $R_s$  is significantly different between the first and second half of the year when the  $F$ -test gives  $P < 0.05$ . doi:10.1371/journal.pone.0057858.g002

with  $T_s$  (Fig. 5B). An exponential function of  $T_s$  accounted for 59% of the seasonal variation in  $Q_{10}$ , with a decay rate constant of 0.04.

The lag between diel oscillations in  $R_s$  and  $T_s$  showed a strong seasonal pattern, with almost no lag in summer but lags up to five hours in the early and late growing season (Fig. 4C). In March and October,  $T_s$  reached its daily minimum at 08:00 and peaked at around 15:00 (Fig. 6A, C). In March  $R_s$  was out-of-phase with  $T_s$ , reaching its daily maximum at 11:00–14:00 and daily minimum at 19:00. In October,  $R_s$  was also out-of-phase with  $T_s$ , peaking at around 12:00 and reaching a minimum at around 24:00. The lags in March and October led to hysteresis loops (Fig. 6D, F), and the correlation between  $R_s$  and  $T_s$  was strongest after lagging  $R_s$  by three hours (Fig. 6G, I). In contrast,  $R_s$  was in phase with  $T_s$  in June (Fig. 6B, E), with the zero lag generating the highest correlation coefficient (Fig. 6H).

## Discussion

### 4.1. Temporal pattern of $R_s$ and hysteresis

Although the annual models fit the temperature response of  $R_s$  reasonably well, they all failed to capture the seasonal dynamics of  $R_s$  without bias over the annual cycle (Fig. 2, 3). This was due to the existence of seasonal hysteresis in the  $R_s$ – $T_s$  relationship, which resulted in  $R_s$  being greater in the second than the first half of the year for a given  $T_s$  (Fig. 2). Hysteresis in the seasonal  $R_s$ – $T_s$  relationship has been reported for various ecosystem types

spanning a broad spectrum of climatic conditions, with the nature and magnitude of hysteresis varying across sites and vegetation types [8,9,24]. The decoupling of  $R_s$  from  $T_s$  is usually attributed to factors that confound the temperature effect. For example, Gaumont-Guay et al. [2] reported that a severe autumn drought caused seasonal hysteresis in the  $R_s$ – $T_s$  relationship, leading to smaller  $R_s$  in autumn than in spring for a given temperature. Biotic factors that may confound the  $R_s$ – $T_s$  relationship include plant photosynthesis, root growth, litterfall dynamics and microbial dynamics [2,9,11]. These factors affect the timing and magnitude of different  $R_s$  components, each of which can respond distinctly to  $T_s$  [25,26]. The observed hysteresis in this study, i.e., with higher  $R_s$  in the autumn than spring for a given  $T_s$ , was in agreement with several previous studies [24,27,28]. The spring–autumn differences can result from increased soil microbial activity during late summer in response to the warming of deeper soil layers [2], or from the accumulation of fresh litter and/or respiring biomass (e.g. microbes and roots) as the season proceeded [4].

Soil moisture has been reported to regulate the seasonal temperature response of  $R_s$ , e.g.,  $Q_{10}$  decreases during drought [29]. However, we did not find any effect of soil  $VWC$  on  $R_s$ . A lack of regulation of  $R_s$  by soil moisture has also been reported for temperate and boreal coniferous forests [9,23]. The relatively low  $VWC$  values (0.05–0.14  $m^3 m^{-3}$ ), which reflect the high evapotranspiration, low soil water holding capacity and good drainage, may help explain the absence of  $VWC$  effect on  $R_s$ . Moreover, soil moisture impacts on  $R_s$  have been most commonly observed in arid or Mediterranean ecosystems, where hot and dry periods are common, during which  $T_s$  and  $VWC$  are negatively correlated [9,29]. The temperate continental monsoon climate at our site features high summer precipitation (~85% of the annual total fell from June to September in 2011), leading to a strong positive correlation between  $T_s$  and  $VWC$  ( $r = 0.79$ ;  $P < 0.01$ ) and providing adequate water for high rates of root and microbial metabolism. Despite the drought in winter, the concurrent low temperatures and thermal limitation may have cancelled the restriction of  $R_s$  by low soil water (Fig. 1). Further investigation is needed to corroborate our conclusion on the role of  $VWC$  due to data gaps in summer (Fig. 1B, C).

We also observed diel lags in the  $R_s$ – $T_s$  relationship (Fig. 4C, 6). Diurnal hysteresis has been quantified and modeled in various forest ecosystems, and was shown to either arise from the mismatch between the depth of temperature measurements and that of  $CO_2$  production, or the regulation of diurnal  $R_s$  by the photosynthetic carbon supply [10,16]. More intriguingly, we found that the diurnal lag between  $R_s$  and  $T_s$  varied dramatically over the season;  $R_s$  and  $T_s$  were in-phase in summer, but  $T_s$  lagged  $R_s$  by about three hours in the early and late growing season (Fig. 4C, 6). Vargas et al. [16] also reported that the lag between hourly soil  $CO_2$  production and  $T_s$  varied each day, showing that there is not a constant diel lag for each vegetation type. Seasonal changes in the diurnal lag as observed in our study may be the combined result of a varying depth of  $CO_2$  production over the season and a constant reference  $T_s$  depth of 10 cm, i.e., with production at superficial layers in spring and autumn, and at deeper layers in summer. The primary depth of  $CO_2$  production may vary seasonally in association with changes in the relative contributions of autotrophic *vs.* heterotrophic respiration [23], as these components often occur at different depths (e.g., shallow litter and soil organic matter decomposition and deep root metabolism). The observed diel  $R_s$ – $T_s$  lags in March and October were unlikely caused by diel variations in photosynthetic carbon supply because most studies demonstrate a higher autotrophic contribution to  $R_s$  in the main growing season when plants are physiologically most

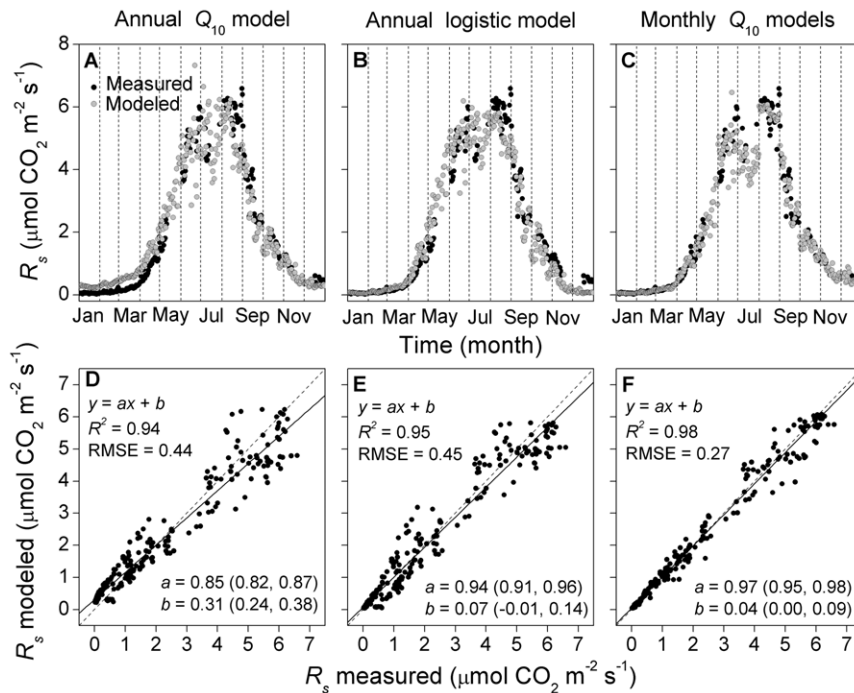

**Figure 3. Comparisons between measured and modeled daily mean soil respiration ( $R_s$ ).** Modeled  $R_s$  values were derived from (A and D) an annual  $Q_{10}$  model, (B and E) an annual logistic model, or (C and F) monthly  $Q_{10}$  models. Values in parentheses in (D–F) represent 95% confidence intervals.

doi:10.1371/journal.pone.0057858.g003

active 23]. In addition, eddy-covariance measurements at our site revealed that ecosystem photosynthesis began in early May and ended in mid October, 2011 (unpublished data), and thus photosynthetic carbon supply was of little relevance to  $R_s$  in March and October.

#### 4.2. Long- vs. short-term temperature response

The short-term temperature response of  $R_s$  (e.g. over the diel cycle) can deviate significantly from that for complete annual cycles because of seasonally-varying biophysical drives (e.g., root dynamics, plant photosynthesis) that confound the relationship of  $R_s$  with temperature [2,4,11]. In this study, average daily  $R_{s10}$  (1.89) and  $Q_{10}$  (2.04) were higher and lower, respectively, than those obtained from the seasonal relationship (2.76 and 1.40  $\mu\text{mol m}^{-2} \text{s}^{-1}$  respectively, Table 1 and Fig. 4A, B). High rates of plant photosynthesis and microbial metabolism in summer are supposed to enhance summer  $R_s$  in addition to  $T_s$ , causing a higher apparent annual  $Q_{10}$  [2,23,30]. In contrast,  $Q_{10}$  calculated from the short-term or high-frequency temperature response is exempt from seasonally confounding effects, and thus better reflects the biological sensitivity of respiration to temperature [6,7,11]. Diel  $Q_{10}$  exhibited large seasonal changes and decreased with increasing  $T_s$  (Fig. 5B), which was consistent with many previous studies [2,6,11]. The reduction in  $Q_{10}$  with increasing  $T_s$  may be associated with the transition from acclimation of enzymatic activity at low temperatures to limitation by substrate supply at high temperatures [2,31]. A peak of  $Q_{10}$  was obvious at the start of the growing season (Fig. 4B), and may reflect a jump in root activity and associated respiration [3]; some studies have demonstrated that autotrophic respiration is more sensitive than microbial respiration to temperature, with the qualification that these studies were based on seasonal rather than short-term responses [23,25,32].

A caveat should be noted when interpreting the dependence of short-term  $Q_{10}$  on temperature. Because the amplitude of  $T_s$  oscillations dampens with depth in the soil profile, the decoupling of  $T_s$  measurement depth from  $\text{CO}_2$  production depth may bias the estimation of temperature sensitivity [2,10]. The result will be an overestimation of  $Q_{10}$  when respiration occurs mostly above the temperature sensor (e.g., in the early and late growing season at our site), and an underestimation of  $Q_{10}$  when respiration occurs mostly below the temperature sensor. Therefore, the  $Q_{10}$ – $T_s$  relationship in Fig. 5 might be partially explained by the dominance of shallow soil organic matter and litter decomposition (<10 cm) at both ends of the growing season when  $T_s$  is low. Experiments incorporating multi-layer  $T_s$  measurements or using the flux-gradient approach are needed to further assess the intrinsic relationship between  $Q_{10}$  and  $T_s$ .

The large seasonal variation in the diel estimates of  $R_{s10}$  reported here was in accordance with existing results from forest studies [2,4], and was responsible for the discrepancy between the larger apparent annual  $Q_{10}$  and the smaller short-term  $Q_{10}$  estimates. The asymmetric seasonal pattern of  $R_{s10}$  resulted in a clear hysteresis relationship between  $R_{s10}$  and  $T_s$  (Fig. 4A, 5A), which was similar to the mixed temperate forest study of Sampson et al. [4]. Instead of largely controlled by  $T_s$ ,  $R_{s10}$  is usually an indicator of phenology, substrate supply, respiring biomass and the activity of roots and microbes [1,4]. The decoupling of daily  $R_{s10}$  from  $T_s$  was responsible for the seasonal hysteresis relationships between  $R_s$  and  $T_s$  observed in this study (Fig. 2).

#### 4.3. Spatial uncertainty of $R_s$

Our results showed variations in the CV of  $R_s$  among locations, ranging from 10% to 50% (Fig. 1C). These values are comparable to those found in an oak-grass savanna where the spatial heterogeneity in vegetation cover was much higher [33]. In a *Picea*

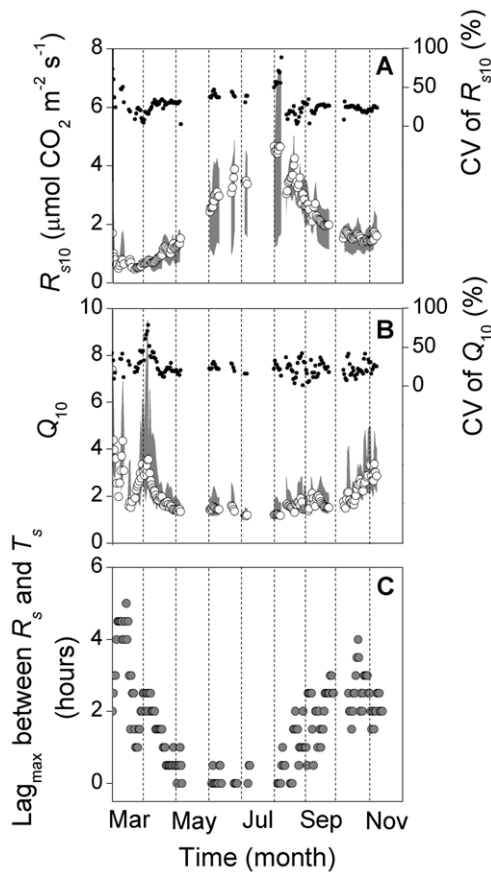

**Figure 4. Daily  $R_{s10}$  (A), daily  $Q_{10}$  (B) and diel lags ( $\text{lag}_{\text{max}}$ ) (C).**  $R_{s10}$  refers to the basal rate of soil respiration at 10°C.  $\text{lag}_{\text{max}}$  indicates the temporal lag that maximizes the correlation between soil respiration ( $R_s$ ) and 10-cm soil temperature ( $T_s$ ) over the diel cycle. Circles in (A–C): mean across measurement locations; grey area in (A and B): range among measurement locations; black dots in (A and B): coefficients of variation (CV) for  $R_{s10}$  and  $Q_{10}$ , respectively. doi:10.1371/journal.pone.0057858.g004

*abies* stand, Buchmann 34] found that within-site variations of  $R_s$  had a CV of 40%. Adachi et al. 35] reported CV of ~40% for  $R_s$  in two subtropical plantations. The mean annual  $R_s$  of 838 g C m<sup>-2</sup> from this study was greater than that found by Yu et al. 1] in a 50-year-old *Platycladus orientalis* plantation in Beijing (645 g C

m<sup>-2</sup>). This discrepancy may arise from the different stand ages and the recent disturbance of the soil by afforestation at our site. Estimated annual  $R_s$  at our site ranged from 538 to 1032 g C m<sup>-2</sup>, with a spatial uncertainty of  $\pm 250$  g C m<sup>-2</sup>. Tang and Baldocchi 33] reported that the annual  $R_s$  was 394 g C m<sup>-2</sup> in the open area and 616 g C m<sup>-2</sup> under trees in an oak-grass savanna. Davidson et al. 36] reported annual  $R_s$  from a temperate mixed hardwood forest that ranged from 530 g C m<sup>-2</sup> at the swamp site to 850 g C m<sup>-2</sup> in a well-drained site. Therefore, the relatively uniform plantation we monitored exhibited  $R_s$  that had comparable spatial variability to that in more heterogeneous stands, probably the consequence of high spatial variability in its biophysical factors [3,29]. The required number of measurement locations for estimating annual  $R_s$  with error limits of 10% and 20% at our site was 45 and 11, respectively, calculated using the equation in 35].

Temperature response parameters also showed pronounced spatial variations (Fig. 2, 4A, B). The seasonal  $Q_{10}$  ranged spatially from 2.30 to 3.57; the daily  $Q_{10}$  showed CV values in the range of 0–50%. Xu and Qi 3] reported that the seasonal  $Q_{10}$  ranged spatially from 1.21 to 2.63 in a young ponderosa plantation in California, with a CV of larger than 20%. These results indicate that a spatially averaged  $Q_{10}$  may not be indicative of the sensitivity of  $R_s$  to temperature in an ecosystem [3].

#### 4.4. Conclusions and implications for carbon modeling

This study's main findings are: (1) despite a strong temperature control on  $R_s$ , both  $R_s$  and short-term estimates of  $R_{s10}$  showed pronounced seasonal hysteresis with respect to  $T_s$  measured at 10-cm depth; (2) lags between  $R_s$  and  $T_s$  were observed at the diel timescale, but only in the early and late growing season; (3) the apparent annual  $Q_{10}$  (2.76) was larger than the mean daily  $Q_{10}$  (2.04), and daily  $Q_{10}$  decreased with increasing temperature. As detailed below, these findings have important implications for ecosystem carbon-cycle modeling.

Debate continues on the use of an invariant vs. biophysically-controlled temperature sensitivity to simulate respiration in carbon cycle models [6,7]. Some authors discovered that after ruling out seasonally confounding factors, convergent seasonal  $Q_{10}$  values (e.g., 1.4) emerged across sites spanning a diversity of climatic and vegetation conditions [7,12]. These studies negate previous conclusions relating  $Q_{10}$  to climate conditions [13,14] and argue for the use of a universal  $Q_{10}$  in modeling ecosystem respiration. In contrast, single-site continuous measurements have revealed large seasonal changes and environmental controls (e.g., soil tempera-

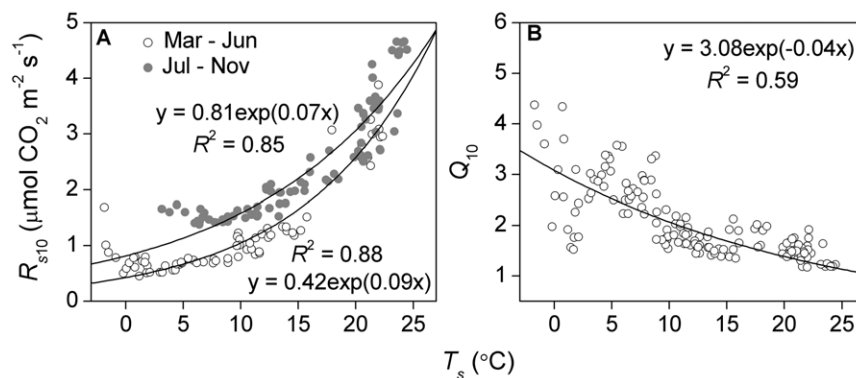

**Figure 5. Relationships between soil temperature ( $T_s$ ) and (A) daily  $R_{s10}$  and (B) daily  $Q_{10}$ .** Open circles in (A) are from March to June, closed circles are from July to November. doi:10.1371/journal.pone.0057858.g005

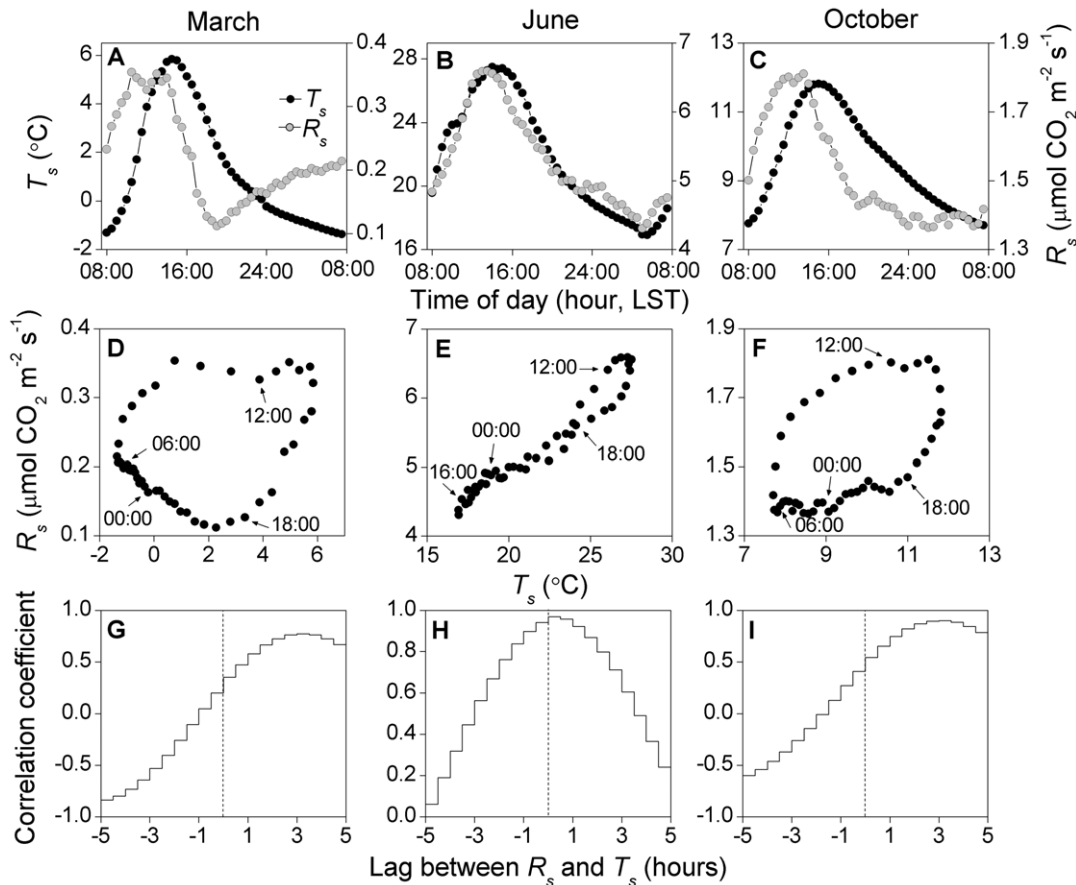

**Figure 6. Diel soil respiration ( $R_s$ ) and temperature ( $T_s$ ) (A–C), diel  $R_s$  vs.  $T_s$  (D–F), their lag correlations (G–I).** Mean values for March, June and October are shown. Grey circles in (A–C):  $R_s$ ; Black circles in (A–C):  $T_s$ .  $T_s$  was monitored at 10-cm depth. The dashed lines in (G–I) are reference lines for the zero lag.

doi:10.1371/journal.pone.0057858.g006

ture and moisture, substrate supply) on short-term unconfounded estimates of  $Q_{10}$  [2,6,11]. Our results add support to the latter finding, showing a clear dependence of daily  $Q_{10}$  on temperature over the growing season.

We propose, however, that the convergent seasonal  $Q_{10}$  and the seasonally-varying short-term  $Q_{10}$  are not necessarily in contradiction with each other, because they both exclude seasonally confounding effects. Both of them, therefore, reflect an unconfounded sensitivity to temperature, albeit at different temporal and spatial scales. The use of a constant vs. variable, environmentally-controlled  $Q_{10}$  in a carbon cycle model then becomes a matter of the scale on which carbon fluxes are simulated. A fixed annual  $Q_{10}$  is considered adequate when the model aims to predict annual carbon budgets at large spatial extents across climatic zones and ecosystem types [7]. In contrast, environmental controls on  $Q_{10}$  in a specific ecosystem should be taken into account when short-term accuracy is required to gain a mechanistic understanding of  $R_s$  dynamics, to forecast the seasonality and diurnal course of  $R_s$ , and to fill gaps in an  $R_s$  time series [6]. For example, eddy-covariance studies have demonstrated that using moving-window approaches (i.e., local fitting) to model the seasonality in the temperature sensitivity and thus the seasonal evolution of  $R_s$  usually obtain better estimations than using a single, fixed annual function [20]. In addition, the use of variable, biophysically-controlled  $Q_{10}$  estimates has the potential to reproduce seasonal hysteresis in the  $R_s$ – $T_s$

relationship, whereas a fixed annual parameter induces seasonal  $R_s$  biases (Fig. 2, 3).

Another important factor in choosing the proper  $Q_{10}$  implementation is the level at which respiratory  $\text{CO}_2$  release is simulated. An ecosystem-specific empirical temperature response model which treats  $R_s$  or  $R_e$  as a composite flux (e.g., combining autotrophic and heterotrophic components) or as an emergent system behavior should adopt the apparent temperature response function because all effects on respiration, including those of confounding factors (e.g., plant phenology), have been implicitly incorporated into the model. In contrast, a process-based, bottom-up model, which explicitly simulates the mechanisms of different respiration components and their driving factors, should be parameterized with unconfounded short-term  $Q_{10}$  values for each component.

Lastly, previous studies [3] and our results imply that ecosystem carbon models should take into account the within-stand spatial uncertainty of temperature response parameters (e.g., as a function of their magnitudes, Fig. 4), rather than merely using a spatially deterministic value.

## Acknowledgments

We thank Xiaomin Bai, Zheng Wei, Xiang Tang and Ben Wang for their assistance with the field measurements and instrumentation maintenance. We are grateful to the two anonymous reviewers and the Academic Editor for providing insightful comments and suggestions. We also thank Dr. Alan



Barr for his help with language revision, and valuable comments on the manuscript.

## References

1. Yu X, Zha T, Pang Z, Wu B, Wang X, et al. (2011) Response of soil respiration to soil temperature and moisture in a 50-year-old oriental arborvitae plantation in China. *PLoS ONE* 6: e28397.
2. Gaumont-Guay D, Black TA, Griffis TJ, Barr AG, Jassal RS, et al. (2006) Interpreting the dependence of soil respiration on soil temperature and water content in a boreal aspen stand. *Agric For Meteorol* 140: 220–235.
3. Xu M, Qi Y (2001) Spatial and seasonal variations of  $Q_{10}$  determined by soil respiration measurements at a Sierra Nevada forest. *Global Biogeochem Cycles* 15: 687–696.
4. Sampson DA, Janssens IA, Curiel Yuste J, Ceulemans R (2007) Basal rates of soil respiration are correlated with photosynthesis in a mixed temperate forest. *Glob Chang Biol* 13: 2008–2017.
5. Bond-Lamberty B, Thomson A (2010) Temperature-associated increases in the global soil respiration record. *Nature* 464: 579–582.
6. Janssens IA, Pilegaard K (2003) Large seasonal changes in  $Q_{10}$  of soil respiration in a beech forest. *Glob Chang Biol* 9: 911–918.
7. Mahecha MD, Reichstein M, Carvalhais N, Lasslop G, Lange H, et al. (2010) Global convergence in the temperature sensitivity of respiration at ecosystem level. *Science* 329: 838–840.
8. Tang J, Baldocchi DD, Xu L (2005) Tree photosynthesis modulates soil respiration on a diurnal time scale. *Glob Chang Biol* 11: 1298–1304.
9. Vargas R, Baldocchi DD, Allen MF, Bahn M, Black TA, et al. (2010) Looking deeper into the soil: biophysical controls and seasonal lags of soil  $CO_2$  production and efflux. *Ecol Appl* 20: 1569–1582.
10. Phillips CL, Nickerson N, Risk D, Bond BJ (2011) Interpreting diel hysteresis between soil respiration and temperature. *Glob Chang Biol* 17: 515–527.
11. Curiel Yuste J, Janssens IA, Carrara A, Ceulemans R (2004) Annual  $Q_{10}$  of soil respiration reflects plant phenological patterns as well as temperature sensitivity. *Glob Chang Biol* 10: 81–94.
12. Wang X, Piao S, Ciais P, Janssens IA, Reichstein M, et al. (2010) Are ecological gradients in seasonal  $Q_{10}$  of soil respiration explained by climate or by vegetation seasonality?. *Soil Biol Biochem* 42: 1728–1734.
13. Chen H, Tian HQ (2005) Does a general temperature-dependent  $Q_{10}$  model of soil respiration exist at biome and global scale? *J Integr Plant Biol* 47: 1288–1302.
14. Zheng ZM, Yu GR, Fu YL, Wang YS, Sun XM, et al. (2009) Temperature sensitivity of soil respiration is affected by prevailing climatic conditions and soil organic carbon content: A trans-China based case study. *Soil Biol Biochem* 41: 1531–1540.
15. Savage K, Davidson EA, Richardson AD, Hollinger DY (2009) Three scales of temporal resolution from automated soil respiration measurements. *Agric For Meteorol* 149: 2012–2021.
16. Vargas R, Detto M, Baldocchi DD, Allen MF (2010) Multiscale analysis of temporal variability of soil  $CO_2$  production as influenced by weather and vegetation. *Glob Chang Biol* 16: 1589–1605.
17. Li H, Yan J, Yue X, Wang M (2008) Significance of soil temperature and moisture for soil respiration in a Chinese mountain area. *Agric For Meteorol* 148: 490–503.
18. Tian DL, Wang GJ, Yan WD, Xiang WH, Peng CH (2010) Soil respiration dynamics in *Cinnamomum camphora* forest and a nearby *Liquidambar formosana* forest in Subtropical China. *Chin Sci Bull* 55: 736–743.
19. Cao J (2011) Above- and belowground carbon pools in different ages of Chinese pine and oriental arborvitae plantation forests in northern mountain areas of Beijing [Ph.D. thesis]: Beijing Forestry University.
20. Moffat AM, Papale D, Reichstein M, Hollinger DY, Richardson AD, et al. (2007) Comprehensive comparison of gap-filling techniques for eddy covariance net carbon fluxes. *Agric For Meteorol* 147: 209–232.
21. Lloyd J, Taylor JA (1994) On the temperature dependence of soil respiration. *Funct Ecol* 8: 315–323.
22. Niu S, Luo Y, Fei S, Montagnani L, Bohrer G, et al. (2011) Seasonal hysteresis of net ecosystem exchange in response to temperature change: patterns and causes. *Glob Chang Biol* 17: 3102–3114.
23. Gaumont-Guay D, Black TA, Barr AG, Jassal RS, Nesic Z (2008) Biophysical controls on rhizospheric and heterotrophic components of soil respiration in a boreal black spruce stand. *Tree Physiol* 28: 161–171.
24. Drewitt GB, Black TA, Nesic Z, Humphreys ER, Jork EM, et al. (2002) Measuring forest floor  $CO_2$  in a Douglas-fir forest. *Agric For Meteorol* 110: 299–317.
25. Boone RD, Nadelhoffer KJ, Canary JD, Kaye JP (1998) Roots exert a strong influence on the temperature sensitivity of soil respiration. *Nature* 396: 570–572.
26. Cable JM, Barron-Gafford GA, Ogle K, Pavao-Zuckerman M, Scott RL, et al. (2012) Shrub encroachment alters sensitivity of soil respiration to temperature and moisture. *J Geophys Res* 117: G01001.
27. Goulden ML, Wofsy SC, Harden JW, Trumbore SE, Crill PM, et al. (1998) Sensitivity of boreal forest carbon balance to soil thaw. *Science* 279: 214–217.
28. Morén AS, Lindroth A (2000)  $CO_2$  exchange at the floor of a boreal forest. *Agric For Meteorol* 101: 1–14.
29. Xu M, Qi Y (2001) Soil-surface  $CO_2$  and its spatial and temporal variations in a young ponderosa pine plantation in northern California. *Glob Chang Biol* 7: 667–677.
30. Reichstein M, Falge E, Baldocchi D, Papale D, Aubinet M, et al. (2005) On the separation of net ecosystem exchange into assimilation and ecosystem respiration: review and improved algorithm. *Glob Chang Biol* 11: 1424–1439.
31. Atkin OK, Bruhn D, Hurry VM, Tjoelker MG (2005) *Evans Review No. 2*: The hot and the cold: unravelling the variable response of plant respiration to temperature. *Funct Plant Biol* 32: 87–105.
32. Bhupinderpal-Singh, Nordgren A, Löfvenius MO, Höglberg MN, Mellander PE, et al. (2003) Tree root and soil heterotrophic respiration as revealed by girdling of boreal Scots pine forest: extending observations beyond the first year. *Plant Cell Environ* 26: 1287–1296.
33. Tang J, Baldocchi DD (2005) Spatial-temporal variation in soil respiration in an oak-grass savanna ecosystem in California and its partitioning into autotrophic and heterotrophic components. *Biogeochemistry* 73: 183–207.
34. Buchmann N (2000) Biotic and abiotic factors controlling soil respiration rates in *Picea abies* stands. *Soil Biol Biochem* 32: 1625–1635.
35. Adachi M, Bekku YS, Konuma A, Kadir WR, Okuda T, et al. (2005) Required sample size for estimating soil respiration rates in large areas of two tropical forests and of two types of plantation in Malaysia. *For Ecol Manage* 210: 455–459.
36. Davidson EA, Belk E, Boone RD (1998) Soil water content and temperature as independent or confounded factors controlling soil respiration in a temperate mixed hardwood forest. *Glob Chang Biol* 4: 217–227.

## Author Contributions

Conceived and designed the experiments: TZ BW XW GH. Performed the experiments: XJ WC HY GH. Analyzed the data: XJ TZ WC. Wrote the paper: XJ TZ BW YZ.
